# Supplementary material
Source: publisher figshare collection journal article supplement (https://acs.figshare.com/ndownloader/files/4636210)

# S1 Supporting Information Contents Page

**Title:** Determination of Analyte Concentration using the Residual Solvent Resonance in  $^1\text{H}$  NMR Spectroscopy

**Authors:** Gregory K. Pierens, Anthony R. Carroll, Rohan A. Davis, Meredith E. Palframan, and Ronald J. Quinn

## Contents:

- S2** Chemical Structures of the Commercially Available Crystalline Compounds (neutral form)
- S3** Example of  $\text{C}_{18}$   $\mu\text{PLC}$  Purity Analysis (Caffeine)
- S4** Example of Two Step qNMR Analysis in  $\text{DMSO-}d_6$  (Caffeine)
- S5** Caffeine /  $\text{DMSO-}d_5$  Integration Ratios Used to Construct 9-Point Calibration Curve
- S6** Single Point Calibration Curve Construction using Caffeine For  $\text{DMSO-}d_5$  Concentration Determination
- S7**  $^1\text{H}$  NMR Spectrum of 3-Chloro-4-hydroxyphenylacetic Acid (sample 11) in  $\text{DMSO-}d_6$  Showing Integrals and Calculations for Concentration Determination
- S8**  $^1\text{H}$  NMR Spectrum of Ellipticine (sample 12) in  $\text{DMSO-}d_6$  Showing Integrals and Calculations for Concentration Determination
- S9**  $^1\text{H}$  NMR Spectrum of Endiandrin A (sample 15) in  $\text{DMSO-}d_6$  Showing Integrals and Calculations for Concentration Determination
- S10**  $^1\text{H}$  NMR Spectrum of Dimethyl-O-endiandrin A (sample 18) in  $\text{DMSO-}d_6$  Showing Integrals and Calculations for Concentration Determination

## S2 Chemical Structures of the Commercially Available Crystalline Compounds (neutral form)

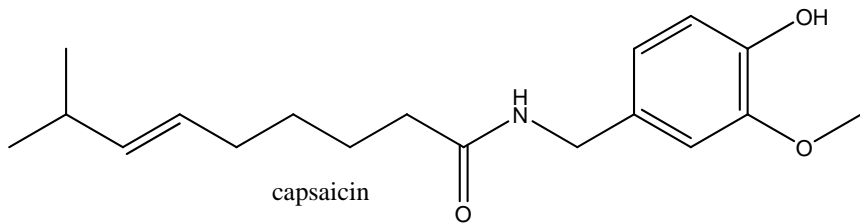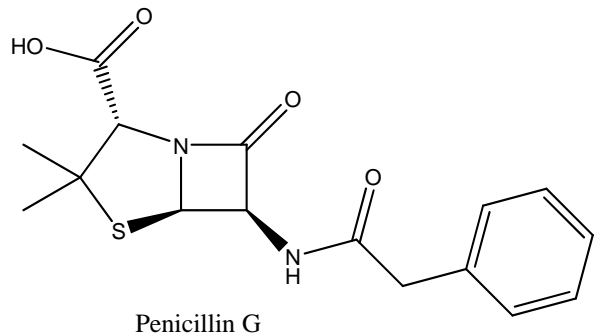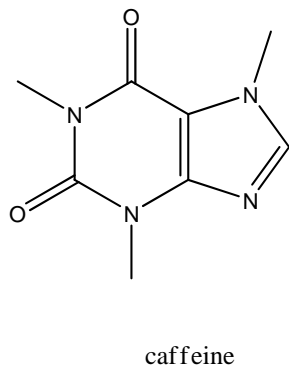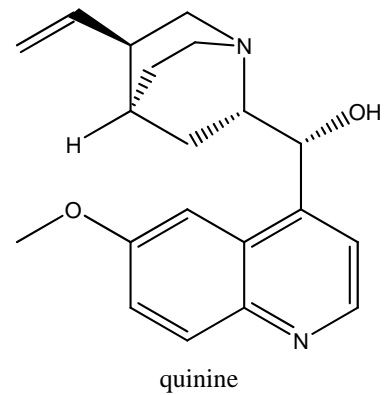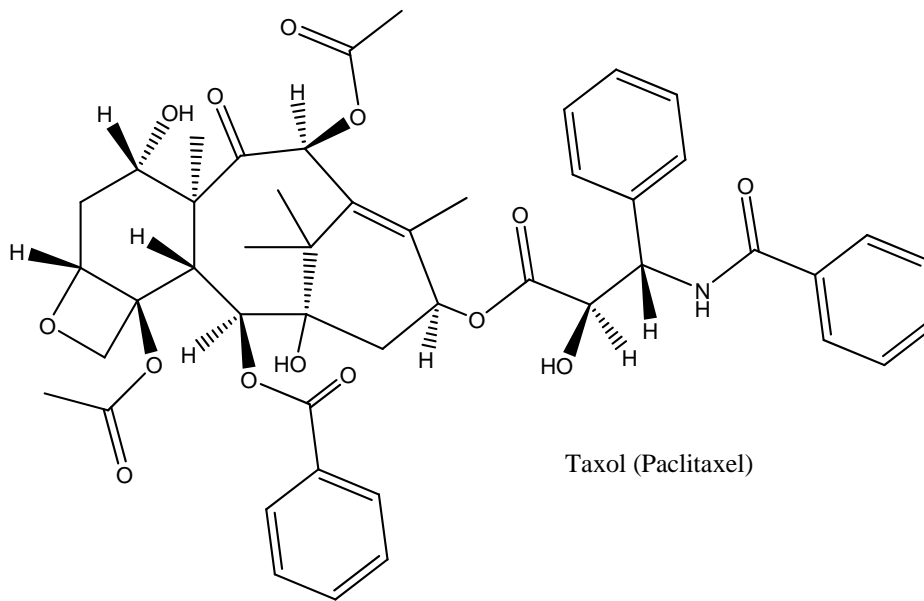

Taxol (Paclitaxel)

# S3 Example of C<sub>18</sub> $\mu$ PLC Purity Analysis (Caffeine)

|                                                |
|------------------------------------------------|
| Data File: COMPOUND PURITY ANALYSIS-002.dat    |
| Method File: Pure Compound Analysis            |
| Column No.: 4                                  |
| Wavelength (nm): 254                           |
| Sample ID: Caffeine                            |
| Load Volume: 3 $\mu$ L                         |
| Column Type: 4209002 C <sub>18</sub> 7 $\mu$ m |

## Peak Information

| <i>Peak #</i> | <i>Retention Time</i> | <i>Area</i> | <i>Area %</i> | <i>Height</i> | <i>FWHM</i> |
|---------------|-----------------------|-------------|---------------|---------------|-------------|
| 1             | 11.25                 | 1.54        | 1.08          | 6.19          | 0.23        |
| 2             | 6.08                  | 140.89      | 98.92         | 693.47        | 0.19        |

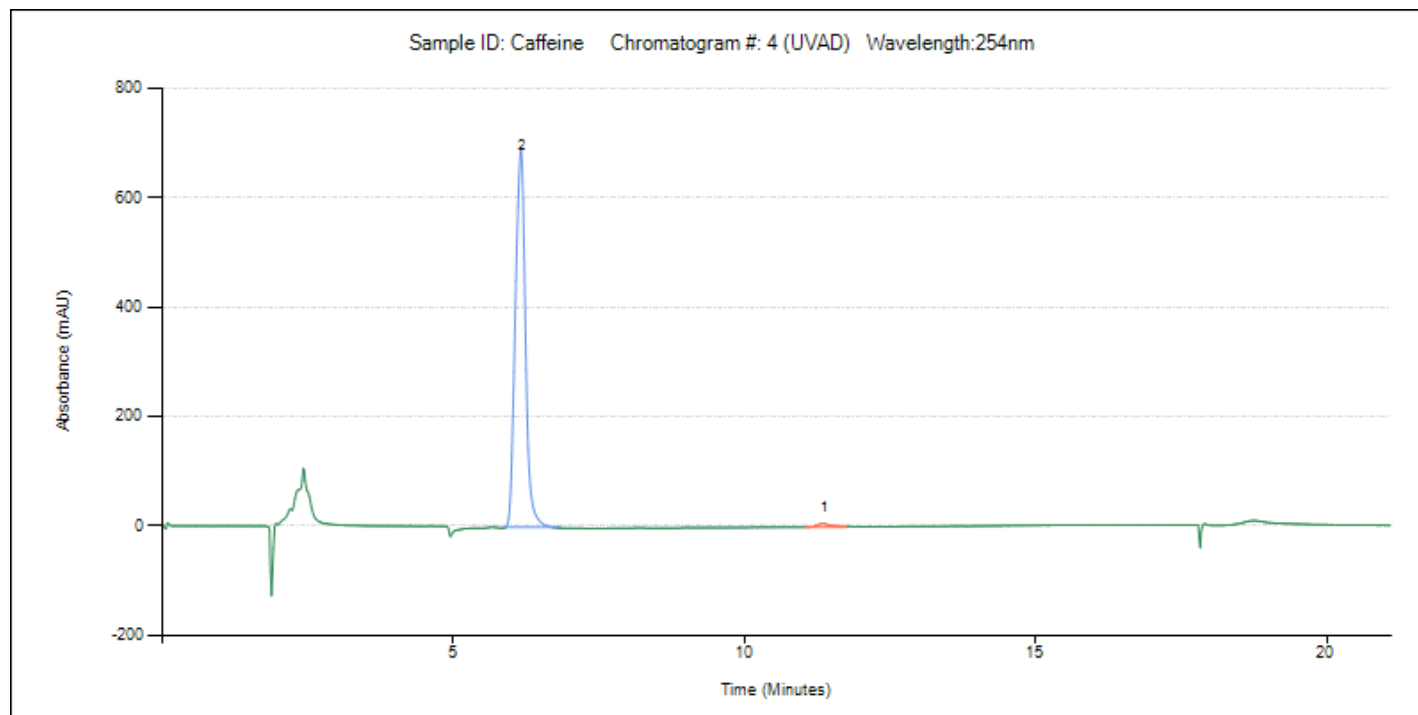

## S4 Example of Two Step qNMR Analysis in DMSO- $d_6$ (Caffeine)

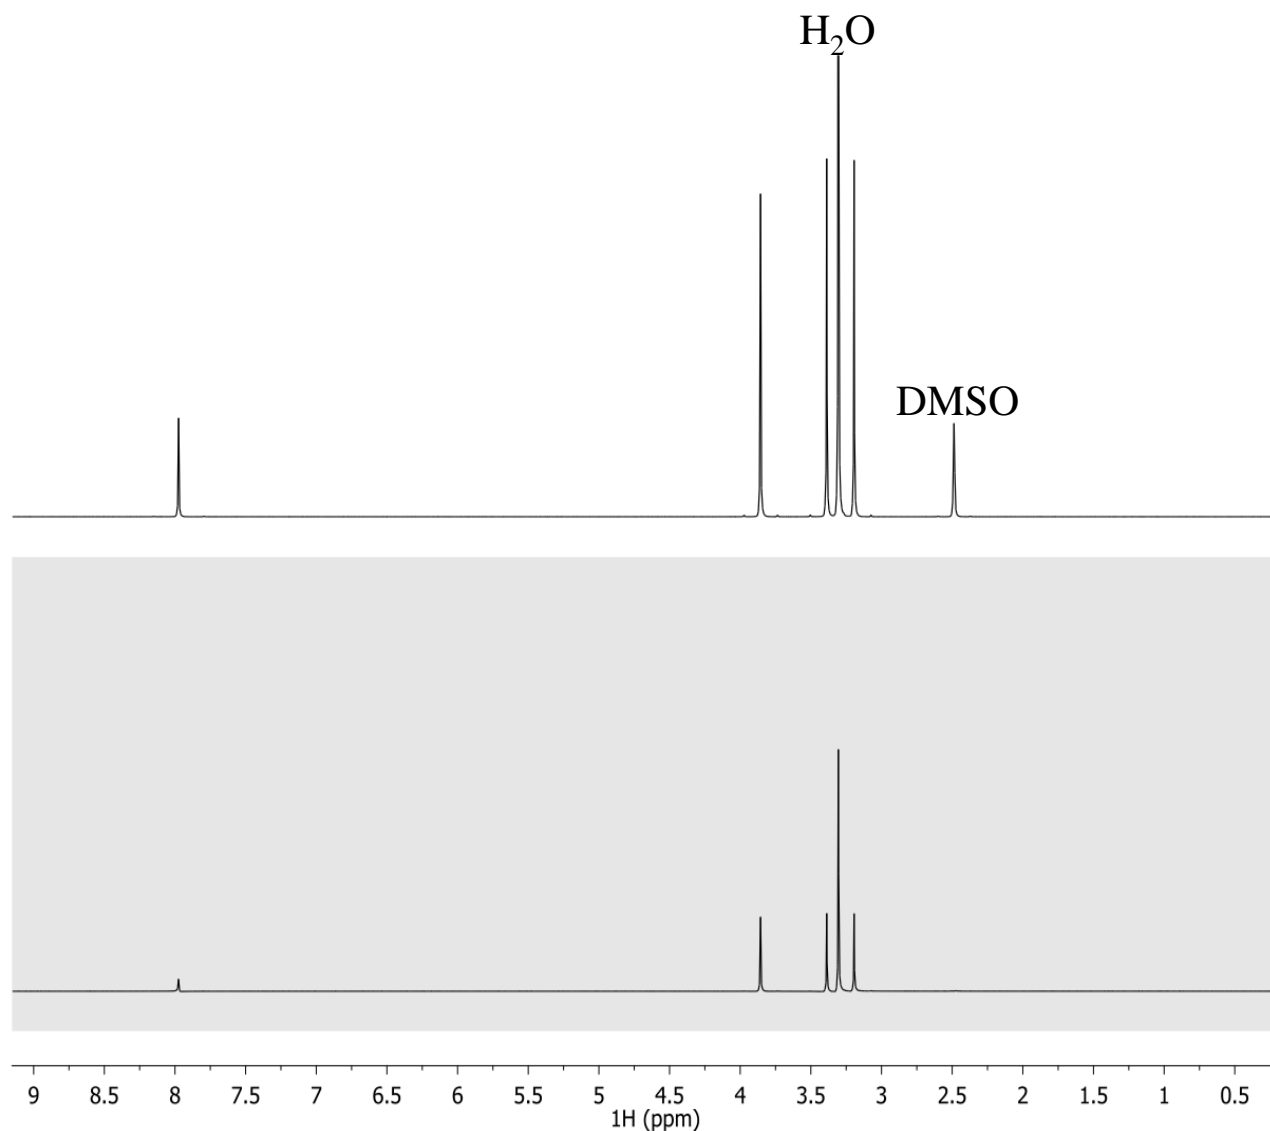

**Step 2:**  $^1\text{H}$  NMR spectrum with  $d1 = 60$  s. Positively phased signals from step 1 can be used for integration and concentration determination.

**Step 1:** Inversion recovery null point experiment. Used to determine which peaks can be used for accurate integration and concentration determination. NB: DMSO signal is nulled and all other signals are positively phased.

## S5 Caffeine / DMSO- $d_5$ Integration Ratios Used to Construct 9-Point Calibration Curve

| Caffeine            | H:DMSO- $d_5$ Ratios |        |        |        |            |
|---------------------|----------------------|--------|--------|--------|------------|
| Concentration (mM ) | n=1                  | n=2    | n=3    | mean   | STDev      |
| 0.098               | 0.0013               | 0.0011 | 0.0011 | 0.0012 | 1.3021E-04 |
| 0.295               | 0.0027               | 0.0024 | 0.0025 | 0.0025 | 1.6187E-04 |
| 0.589               | 0.0051               | 0.0054 | 0.0055 | 0.0053 | 1.7227E-04 |
| 0.982               | 0.0101               | 0.0091 | 0.0101 | 0.0098 | 5.9454E-04 |
| 2.945               | 0.0297               | 0.0295 | 0.0294 | 0.0295 | 1.5822E-04 |
| 5.890               | 0.0587               | 0.0586 | 0.0588 | 0.0587 | 9.4197E-05 |
| 9.820               | 0.1026               | 0.1024 | 0.1012 | 0.1021 | 7.6686E-04 |
| 29.450              | 0.2971               | 0.2972 | 0.2970 | 0.2971 | 1.2446E-04 |

- Each sample was measured 3 times (n = 1-3) and H:DMSO- $d_5$  result averaged and saved under the “mean”
- The standard deviation for the 3 experiments (n=1-3) was calculated
- DMSO- $d_6$  (Batch # 7H-266)

## S6 Single Point Calibration Curve Construction using Caffeine For DMSO- $d_5$ Concentration Determination

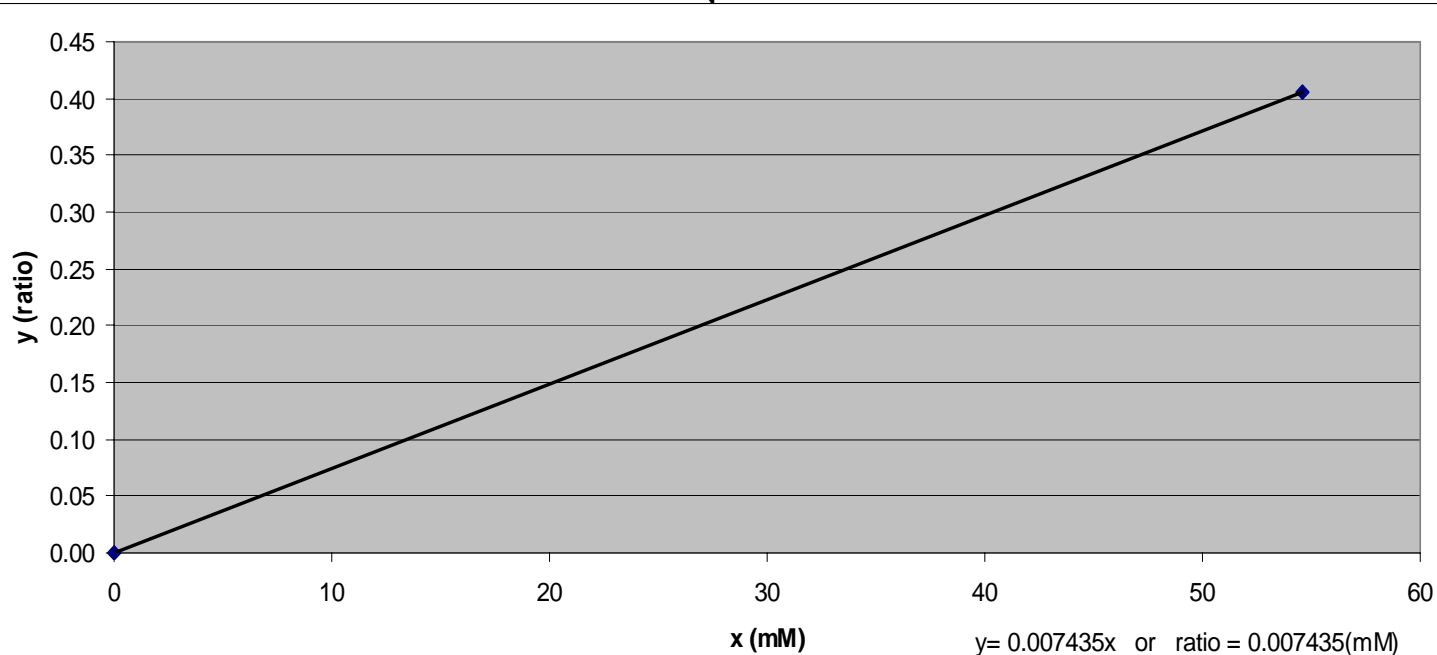

DMSO- $d_6$  (Batch # 6K-382)

$y = \text{H:DMSO-}d_5 \text{ ratio}$

$x = \text{caffeine concentration (mM)}$

Worked example for DMSO- $d_5$  concentration determination:

1. Make up caffeine standard (54.6 mM) in DMSO- $d_6$  and then run 2-step qNMR experiment
2. Measure ratio of integrals, H:DMSO- $d_5 = 0.406$
3. Gradient of calibration curve  $= 0.406/54.6 = 0.007435$
4. Concentration of DMSO- $d_5 = 1/0.007435 = 134.5 \text{ mM}$

# S7 $^1\text{H}$ NMR Spectrum of 3-Chloro-4-Hydroxyphenylacetic Acid (sample 11) in $\text{DMSO}-d_6$ Showing Integrals and Calculations for Concentration Determination

Integral for  $\text{DMSO}-d_5 = 0.73$

Integral for 1H of Compound =  $7.28 / 7\text{H} = 1.04$

$\text{DMSO}-d_5$  Concentration (Batch # 6L-488) = 59.1 mM

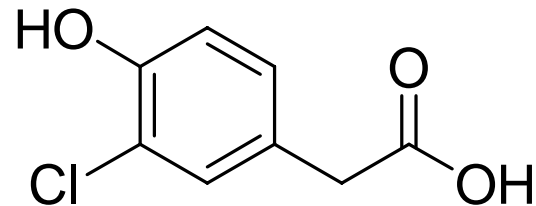

$$\frac{\text{Compound Concentration}}{\text{Integral for 1H of Compound}} = \frac{\text{DMSO-}d_5 \text{ Concentration}}{\text{Integral for DMSO-}d_5}$$

$$\frac{\text{Compound Concentration}}{1.04} = \frac{59.1}{0.73}$$

$$\text{Compound Concentration} = 84.26 \text{ mM}$$

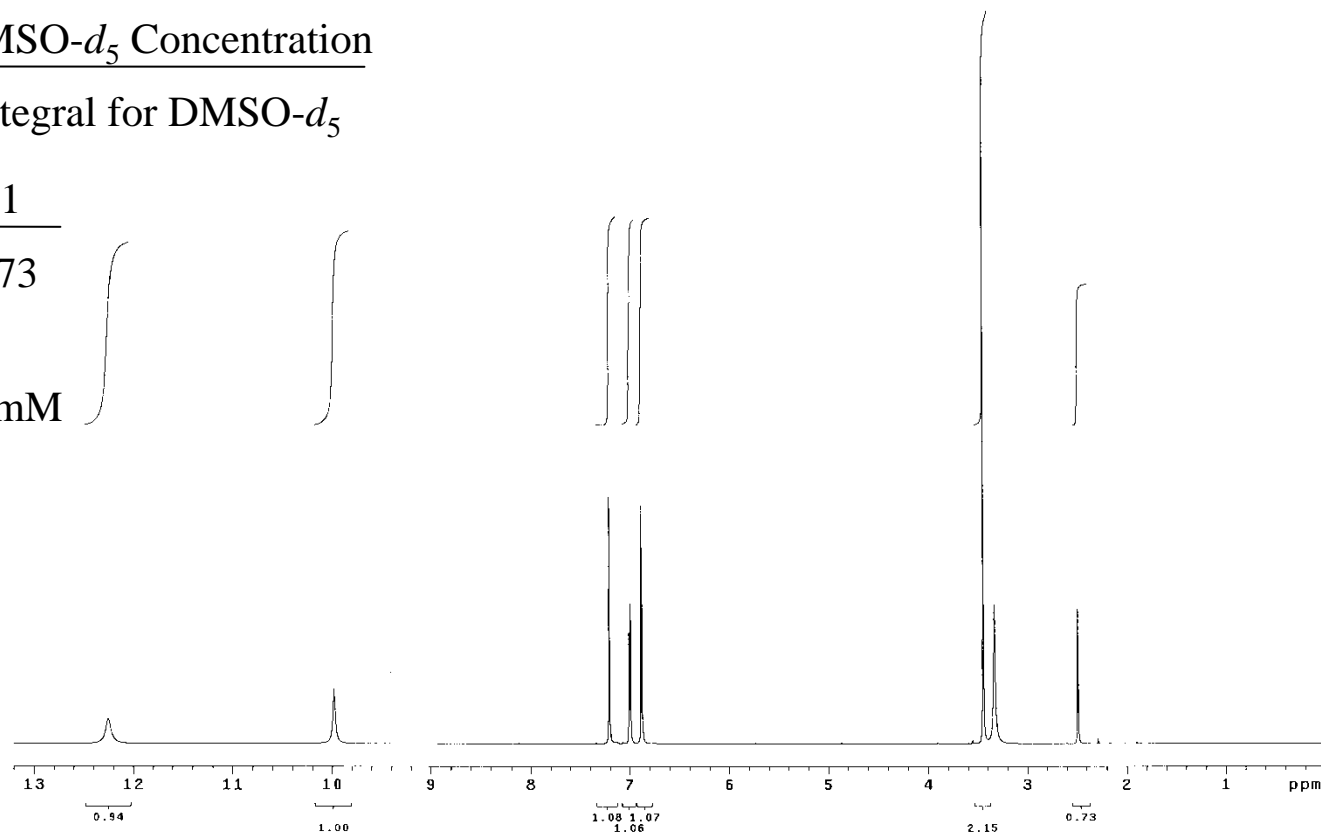

# S8 $^1\text{H}$ NMR Spectrum of Ellipticine (sample 12) in $\text{DMSO}-d_6$ Showing Integrals and Calculations for Concentration Determination

Integral for  $\text{DMSO}-d_5 = 7.51$

Integral for 1H of Compound =  $8.01 / 8\text{H} = 1.001$

$\text{DMSO}-d_5$  Concentration (Batch # 6L-488) = 59.1 mM

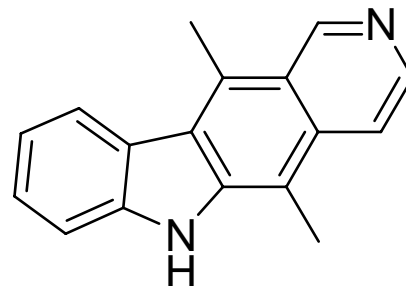

$$\frac{\text{Compound Concentration}}{\text{Integral for 1H of Compound}} = \frac{\text{DMSO}-d_5 \text{ Concentration}}{\text{Integral for DMSO}-d_5}$$

$$\frac{\text{Compound Concentration}}{1.001} = \frac{59.1}{7.51}$$

Compound Concentration = 7.9 mM

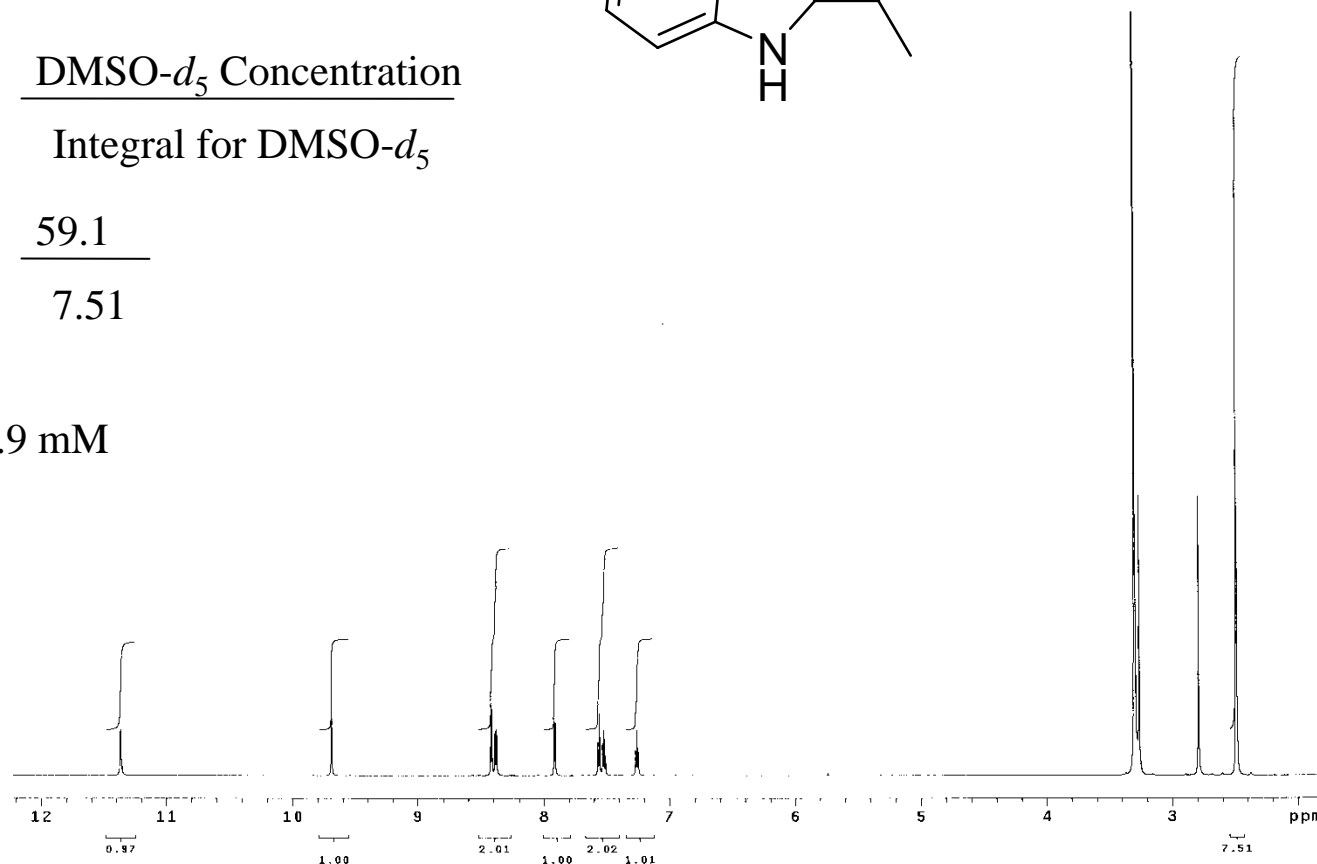



# S9 <sup>1</sup>H NMR Spectrum of Endiandrin A (sample 15) in DMSO-*d*<sub>6</sub> Showing Integrals and Calculations for Concentration Determination

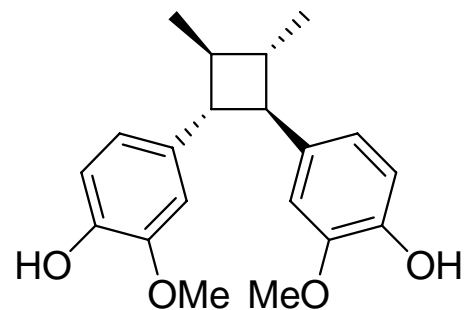

Integral for DMSO-*d*<sub>5</sub> = 5.25

Integral for 1H of Compound = 12.35 / 24H = 0.5145

DMSO-*d*<sub>5</sub> Concentration (Batch # 6L-488) = 59.1 mM

$$\frac{\text{Compound Concentration}}{\text{Integral for 1H of Compound}} = \frac{\text{DMSO-}d_5 \text{ Concentration}}{\text{Integral for DMSO-}d_5}$$

$$\frac{\text{Compound Concentration}}{0.5145} = \frac{59.1}{5.25}$$

Compound Concentration = 5.8 mM

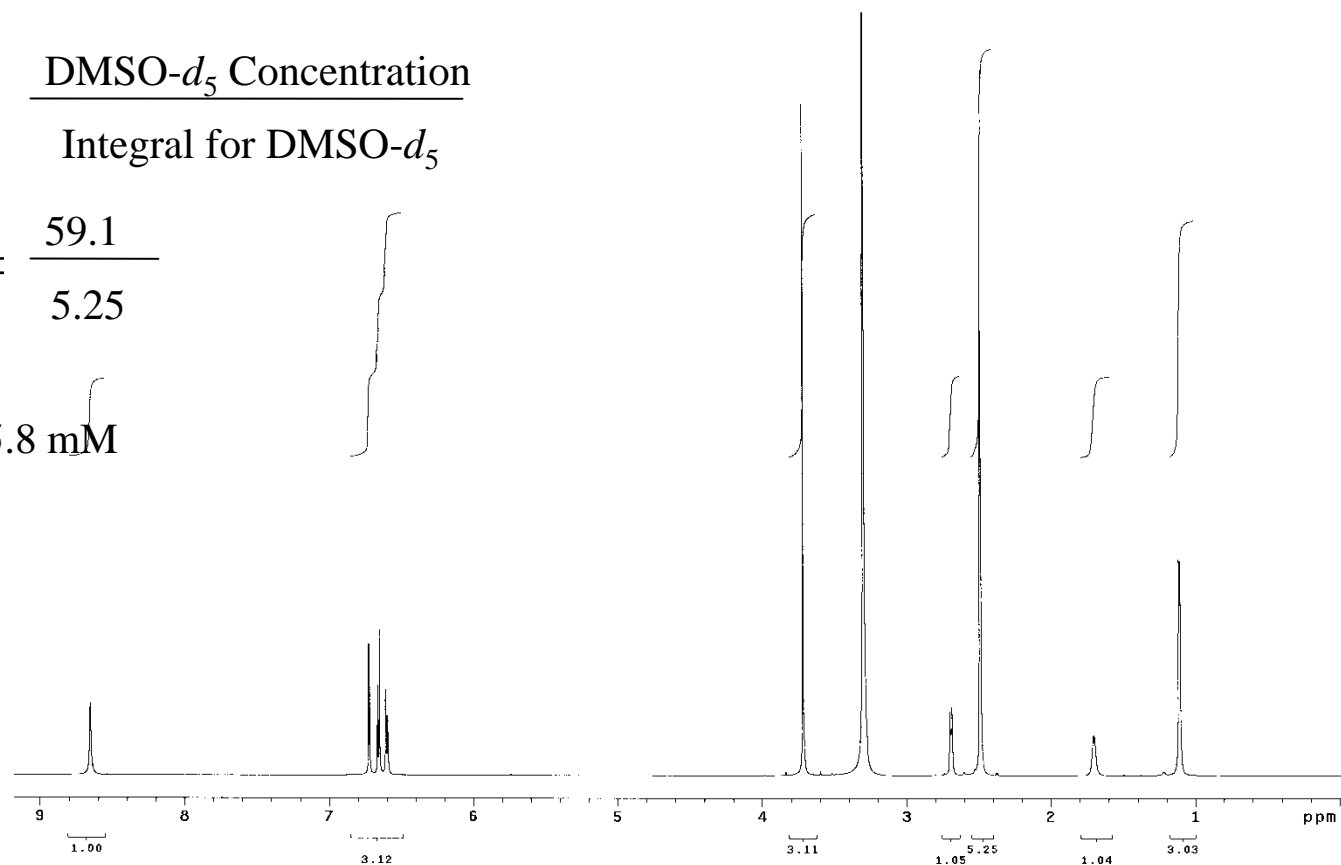

# S10 $^1\text{H}$ NMR Spectrum of Dimethyl-O-endiandrin A (sample 18) in $\text{DMSO}-d_6$ Showing Integrals and Calculations for Concentration Determination

Integral for  $\text{DMSO}-d_5 = 4.24$

Integral for 1H of Compound =  $14.27 / 28\text{H} = 0.509$

$\text{DMSO}-d_5$  Concentration (Batch # 6L-488) = 59.1 mM

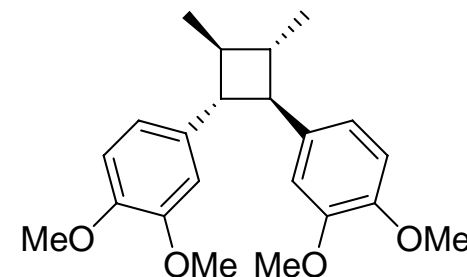

$$\frac{\text{Compound Concentration}}{\text{Integral for 1H of Compound}} = \frac{\text{DMSO-}d_5 \text{ Concentration}}{\text{Integral for DMSO-}d_5}$$

$$\frac{\text{Compound Concentration}}{0.509} = \frac{59.1}{4.24}$$

Compound Concentration = 7.1 mM

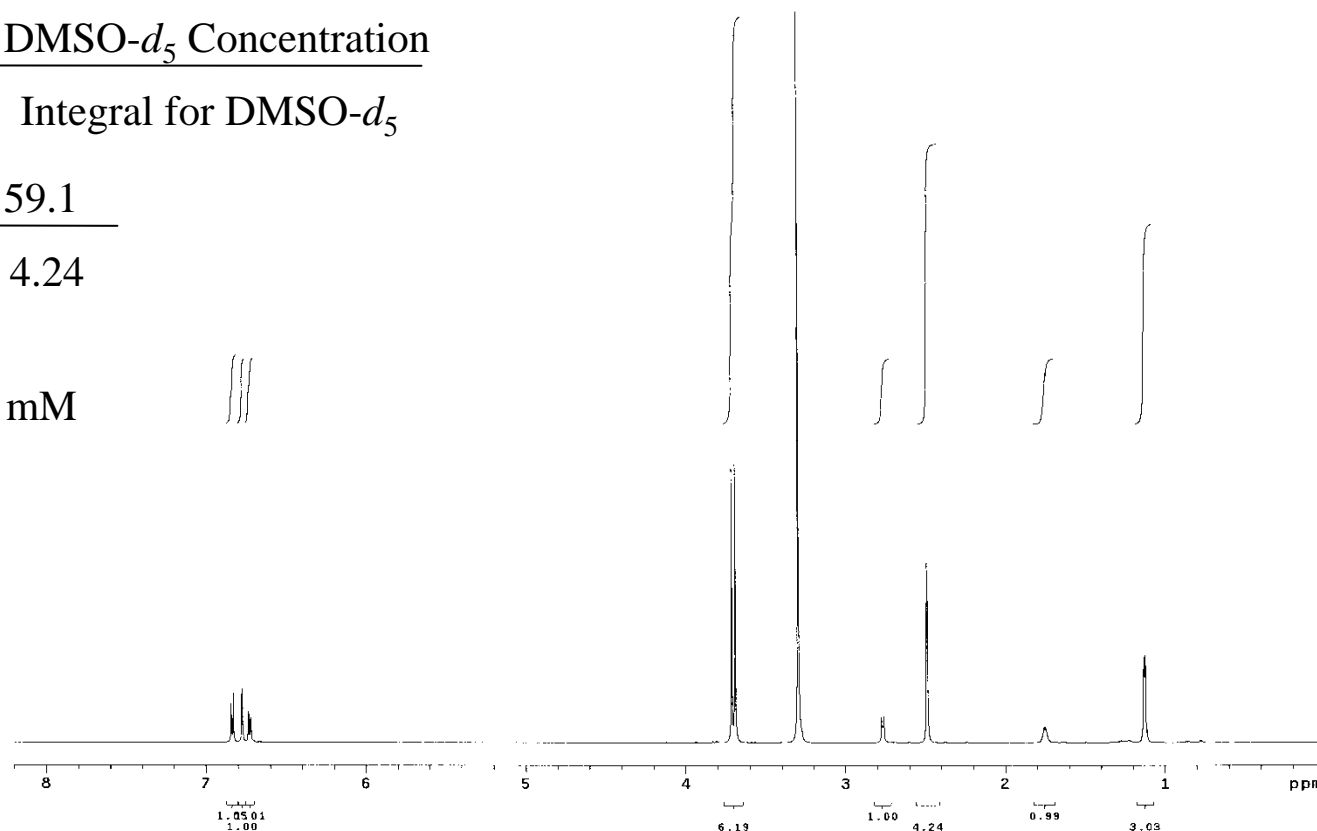

Supplement: Supplementary file 1 [file 4636210]
